# Supplementary material
Source: Springer Nature journal article supplement (https://www.springermedizin.de/resource/supplementary/13012_2008_138_MOESM2_ESM.pdf/9629442)
Supplement: MOESM2 [file 9629442]

| module               | test                                   | label on feedback form                       |
|----------------------|----------------------------------------|----------------------------------------------|
| diabetes type 2      | glucose random                         | glucose f/ nf                                |
|                      | glucose non-fasting                    | glucose f/ nf                                |
|                      | glucose fasting                        | glucose f/ nf                                |
|                      | HbA1c                                  | HbA1c                                        |
|                      | total cholesterol                      | T-cholesterol                                |
|                      | HDL                                    | HDL                                          |
|                      | LDL                                    | LDL                                          |
|                      | triglycerides                          | triglyc                                      |
|                      | creatinine                             | creat                                        |
|                      | albumin concentration, urine           | albumin urine                                |
|                      |                                        |                                              |
| dyspepsia            | <sup>13</sup> C-ureum breath test      | breath test                                  |
|                      | <sup>14</sup> C-ureum breath test      | breath test                                  |
|                      | faeces test HP                         | faeces test HP                               |
|                      | faeces test HP (PCR)                   | feces test HP                                |
|                      | helicobacter pylori, IgG               | antibodies HP                                |
|                      | helicobacter pylori, any antibodies    | antibodies HP                                |
|                      | helicobacter pylori, IgM               | antibodies HP                                |
|                      | gastroscopy                            | gastroscopy                                  |
|                      | X-ray, stomach                         | X-ray, stomach                               |
|                      |                                        |                                              |
|                      |                                        |                                              |
| anaemia              | Hb                                     | Hb/ Ht                                       |
|                      | Ht                                     | Hb/ Ht                                       |
|                      | anaemia diagnostic cascade             | anaemia cascade                              |
|                      | ferritin                               | ferritin                                     |
|                      | bilirubin                              | bilirubin                                    |
|                      | folic acid                             | folic acid                                   |
|                      | vitamin B12                            | vit B12                                      |
|                      | reticulocytes                          | reticulocytes                                |
|                      | serum iron                             | serum iron                                   |
|                      | LDH                                    | LDH                                          |
|                      | total iron binding capacity            | transferrin/TIBC                             |
|                      | transferrin                            | transferrin/TIBC                             |
|                      |                                        |                                              |
|                      |                                        |                                              |
| chlamydia            | chlamydia DNA test, urine (PCR)        | chlamydia urine                              |
|                      | chlamydia DNA test, endocervical (PCR) | chlamydia endocervical/vaginal               |
|                      | chlamydia DNA test, vaginal swab (PCR) | chlamydia endocervical/vaginal               |
|                      | antibodies chlamydia trachomatis, IgA  | antibodies CT                                |
|                      | antibodies chlamydia trachomatis, IgG  | antibodies CT                                |
|                      | antibodies chlamydia trachomatis, any  | antibodies CT                                |
|                      | antibodies chlamydia trachomatis, IgM  | antibodies CT                                |
|                      |                                        |                                              |
| prostate complaints  | creatinine                             | creat                                        |
|                      | PSA                                    | PSA                                          |
|                      | PSA complex                            | PSA                                          |
|                      | free/total PSA ratio                   | F/T-PSA                                      |
|                      |                                        |                                              |
| rheumatic complaints | Waeler-Rose                            | (semi-)qualitative rheumatic disease markers |
|                      | Latex test                             | (semi-)qualitative rheumatic disease markers |

|                           |                                           |                               |
|---------------------------|-------------------------------------------|-------------------------------|
|                           | IgM rheumatic disease markers             | IgM rheumatic disease markers |
|                           | anti-cyclic citrulline peptide antibodies | anti-CCP                      |
|                           | ESR                                       | ESR                           |
|                           | CRP                                       | CRP                           |
|                           | X-ray wrist                               | X-hand/foot/wrist             |
|                           | X-ray MTP                                 | X-hand/foot/wrist             |
|                           | antistreptolysin antibodies titer         | AST                           |
|                           |                                           |                               |
|                           |                                           |                               |
| thyroid disease           | TSH                                       | TSH                           |
|                           | thyroid diagnostics (cascade)             | thyroid cascade               |
|                           | FT4                                       | FT4                           |
|                           | T3                                        | T3                            |
|                           | TSH-receptor stimulating antibodies       | TSI                           |
|                           | thyroid peroxidase (TPO) antibodies       | TPO-Ab                        |
|                           | ESR                                       | ESR                           |
|                           | leucocytes                                | luco diff                     |
|                           | leucocyte differentiation                 | luco diff                     |
|                           | thyroid ultrasound                        | US thyroid                    |
|                           |                                           |                               |
|                           |                                           |                               |
| UTI                       | urine culture and susceptibility testing  | Urine culture                 |
|                           |                                           |                               |
|                           |                                           |                               |
| dyslipidaemia             | total cholesterol                         | T-cholesterol                 |
|                           | HDL                                       | HDL                           |
|                           | LDL                                       | LDL                           |
|                           | triglycerides                             | triglycerides                 |
|                           | total cholesterol/HDL ratio               | ratio T-cho/HDL               |
|                           | homocystein                               | homocystein                   |
|                           |                                           |                               |
|                           |                                           |                               |
| perimenopausal complaints | follicle-stimulating hormone (FSH)        | FSH                           |
|                           | luteinizing hormone (LH)                  | LH                            |
|                           | estradiol                                 | estradiol                     |
|                           |                                           |                               |
|                           |                                           |                               |
|                           |                                           |                               |
|                           |                                           |                               |
